# Supplementary material for: Synthesis and spectroscopic investigation of a novel sensitive and selective fluorescent chemosensor for Ag+based on a BINOL–glucose derivative
Source: Royal Society of Chemistry journal article supplement (doi:10.1039/c8ra04429e), 2018-01-01
Supplement: c8ra04429e1.pdf [file c8ra04429e1.pdf]

Supporting Information

**A Novel Sensitive and Selective Fluorescent Chemosensor  
for Ag<sup>+</sup> based on BINOL-Glucose Derivative and  
Spectroscopic Investigation**

Yu Hu,<sup>a b</sup> Huayin Shen,<sup>a</sup> Xiaohan Zhang,<sup>a</sup> Yang Liu,<sup>a</sup> and Xiaoxia Sun<sup>\*a</sup>

<sup>a</sup> Jiangxi Key Laboratory of Organic Chemistry, Jiangxi Science and Technology Normal University, Nanchang, 330013, China

<sup>b</sup> College of Chemistry, Nanchang University, Nanchang, China

Email: sunxiaoxia77@126.com

**Contents**

|                                                                                                                       |    |
|-----------------------------------------------------------------------------------------------------------------------|----|
| 1 Synthesis of 2,3,4,6-Tetra-O-acetyl-alpha-D-glucofuranosyl bromide.....                                             | S2 |
| 2 Synthesis of 2,3,4,6-Tetra-O-acetyl-beta-D-glucofuranosyl azide.....                                                | S2 |
| 3 <sup>1</sup> HNMR, <sup>13</sup> CNMR of ( <i>S</i> , <i>β</i> - <i>D</i> )-2(CDCl <sub>3</sub> ).....              | S3 |
| 4 <sup>1</sup> HNMR, <sup>13</sup> CNMR of ( <i>S</i> , <i>β</i> - <i>D</i> )-1(CD <sub>3</sub> OD).....              | S4 |
| 5 ESI-MS of ( <i>S</i> , <i>β</i> - <i>D</i> )-2 and ( <i>S</i> , <i>β</i> - <i>D</i> )-1.....                        | S5 |
| 6 ESI-MS of [( <i>S</i> , <i>β</i> - <i>D</i> )-1+Ag <sup>+</sup> +H <sup>+</sup> ].....                              | S6 |
| 7 Fluorescence spectra of ( <i>S</i> , <i>β</i> - <i>D</i> )-1 (2 × 10 <sup>-5</sup> mol/L in THF) .....              | S6 |
| 8 UV-vis spectra titration and Fluorescence spectra Fluorescence spectra of ( <i>S</i> , <i>β</i> - <i>D</i> )-1..... | S7 |
| 9 Hildebrand-Benesi plot base on ( <i>S</i> , <i>β</i> - <i>D</i> )-1.....                                            | S8 |
| 10 The limit of detection (LOD) .....                                                                                 | S8 |

### Synthesis of 2,3,4,6-Tetra-O-acetyl- $\alpha$ -D-glucopyranosyl bromide

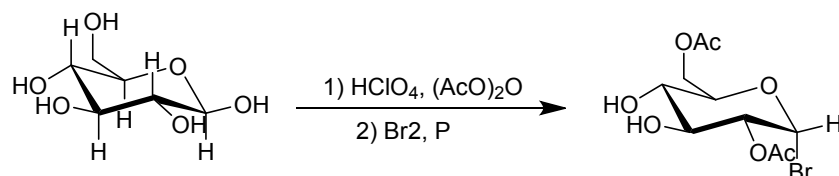

At 273 K, perchloric acid (0.2 mL, 0.2 mol) was added slowly to acetic anhydride (25 mL, 0.25 mol) in 100 mL flask. After stirring for 5 min, glucose (5 g) and 0.03 phosphorus (5 g, 0.45 mol) was separated added to the flask and the mixture was stirred for another 10 min, then Br<sub>2</sub> (3 mL, 0.12 mol) was added slowly. The mixture was slowly rises to the room temperature reaction of 1 h. At 273K, 3 mL of water was added to the reaction system and the reaction was stirred 2 h. Finally, 20 mL CH<sub>2</sub>Cl<sub>2</sub> was added and the mixture was then poured into 100 mL ice water. Filter out excess red phosphorus, separate the organic phase, clean the water layer with CH<sub>2</sub>Cl<sub>2</sub> for three times, combine organic phase, and wash it to neutral with saturated Na<sub>2</sub>CO<sub>3</sub> solution. Wash with saturated salt water and dry MgSO<sub>4</sub> without water. Filter and spin. Finally, the white solid 9.8 g was obtained by recrystallization with ether petroleum ether, and the yield was 86%. <sup>1</sup>HNMR(400 MHz, CDCl<sub>3</sub>)  $\delta$  6.61 (d, J = 9.5 Hz, 1H), 5.56 (d, J = 9.8 Hz, 1H), 5.14 (s, 1H), 4.83 (d, J = 8.9 Hz, 1H), 4.31 (s, 1H), 4.12 (s, 1H), 4.08 (s, 1H), 2.06 (dd, J = 28.0, 9.5 Hz, 12H).

### Synthesis of 2,3,4,6-Tetra-O-acetyl- $\beta$ -D-glucopyranosyl azide

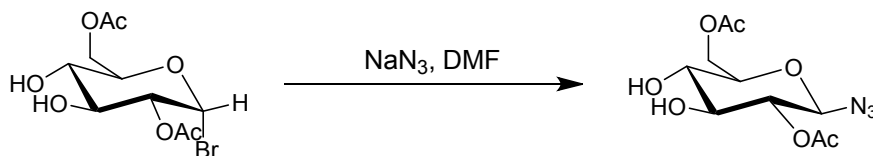

NaN<sub>3</sub>(3.2 g, 49.85 mmol) was added to 2,3,4,6-Tetra-O-acetyl- $\alpha$ -D-glucopyranosyl bromide in 50 ml DMF under Ar<sub>2</sub>. The mixture was stirred for 12 h at room temperature and then pured into 200 ml ice-water. White solid was appeared quickly under hardly stirred. Filtered and washed with cold water. White solid 2.7 g was obtained with 73% yield. <sup>1</sup>HNMR (400 MHz, CDCl<sub>3</sub>)  $\delta$  5.21 (d, J = 9.5 Hz, 1H), 5.12 (d, J = 9.8 Hz, 1H), 4.96 (s, 1H), 4.65 (d, J = 8.9 Hz, 1H), 4.27 (s, 1H), 4.19 (s, 1H), 3.81 (s, 1H), 2.06 (dd, J = 28.0, 9.5 Hz, 12H).

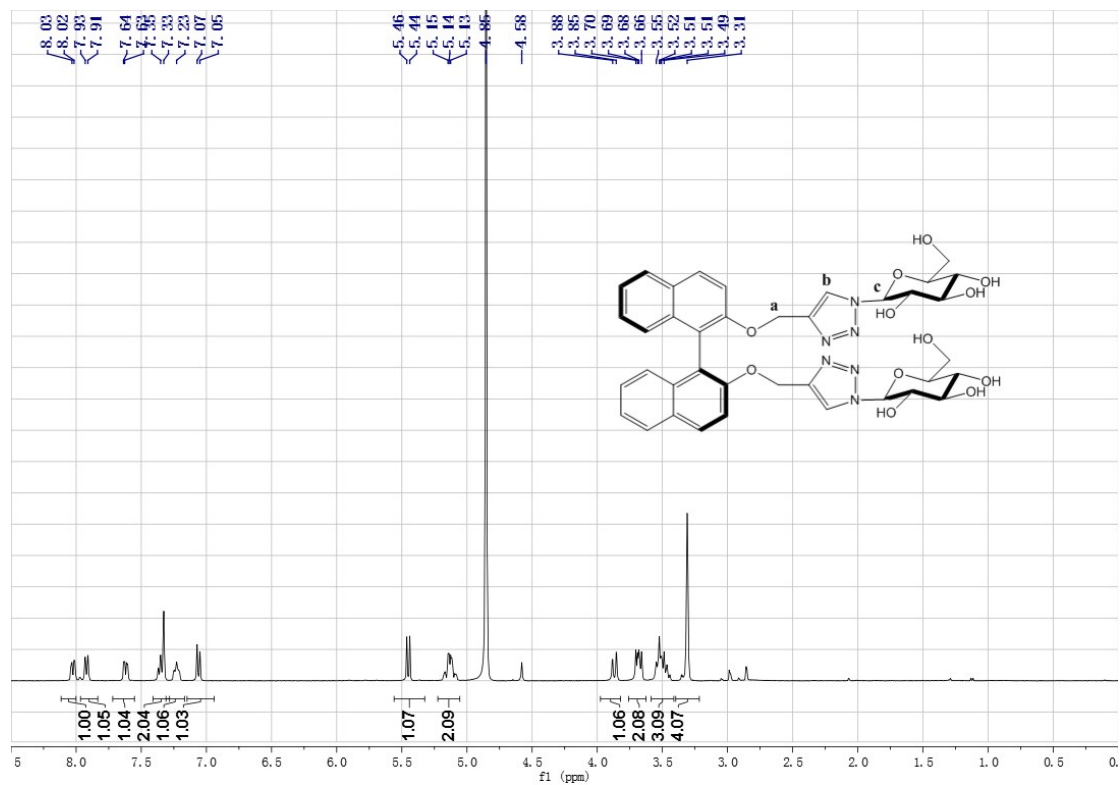

Figure S1  $^1\text{H}$ NMR of *(S, \beta-D)*-1( $\text{CD}_3\text{OD}$ )

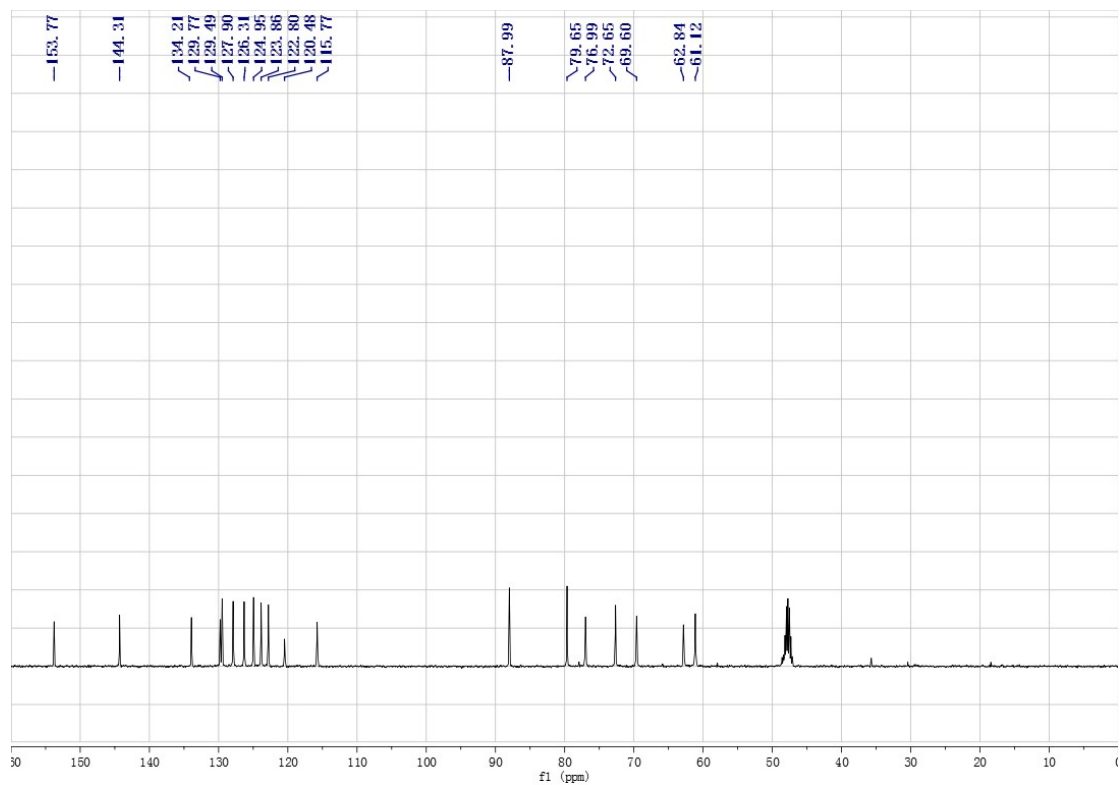

Figure S2 <sup>1</sup>HNMR, <sup>13</sup>CNMR of (*S*,  $\beta$ -*D*)-1(CD<sub>3</sub>OD)

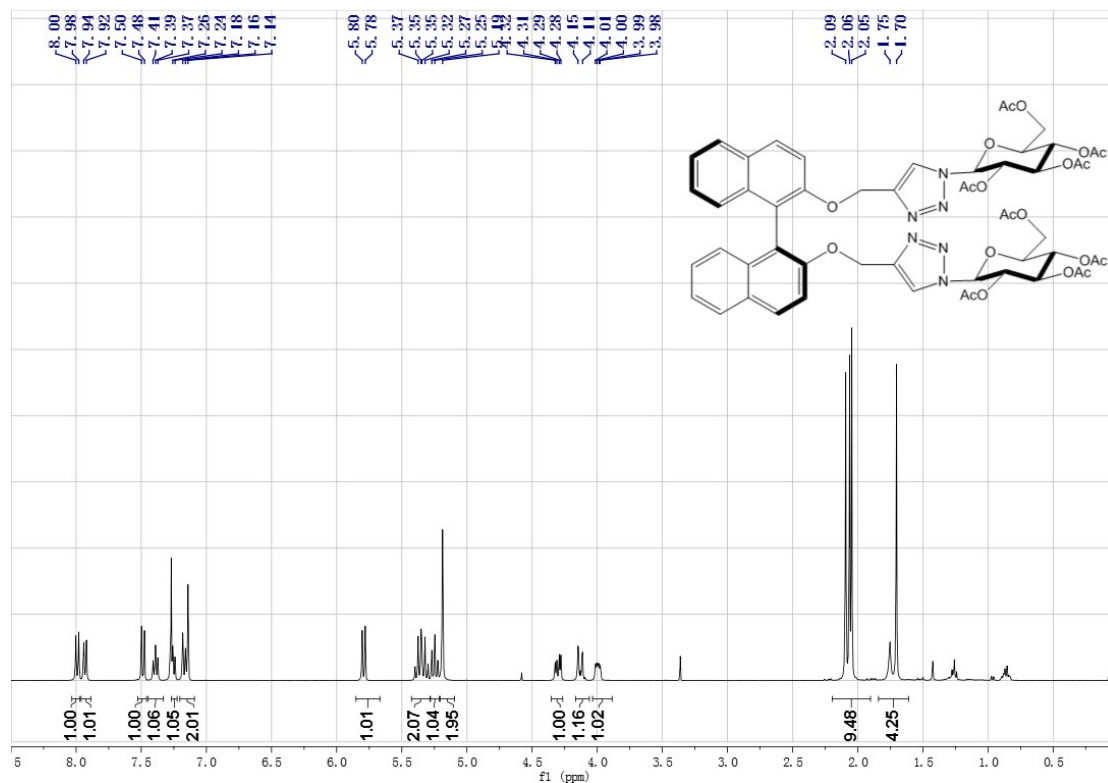

Figure S3 <sup>1</sup>HNMR of (*S*,  $\beta$ -*D*)-2(CDCl<sub>3</sub>)

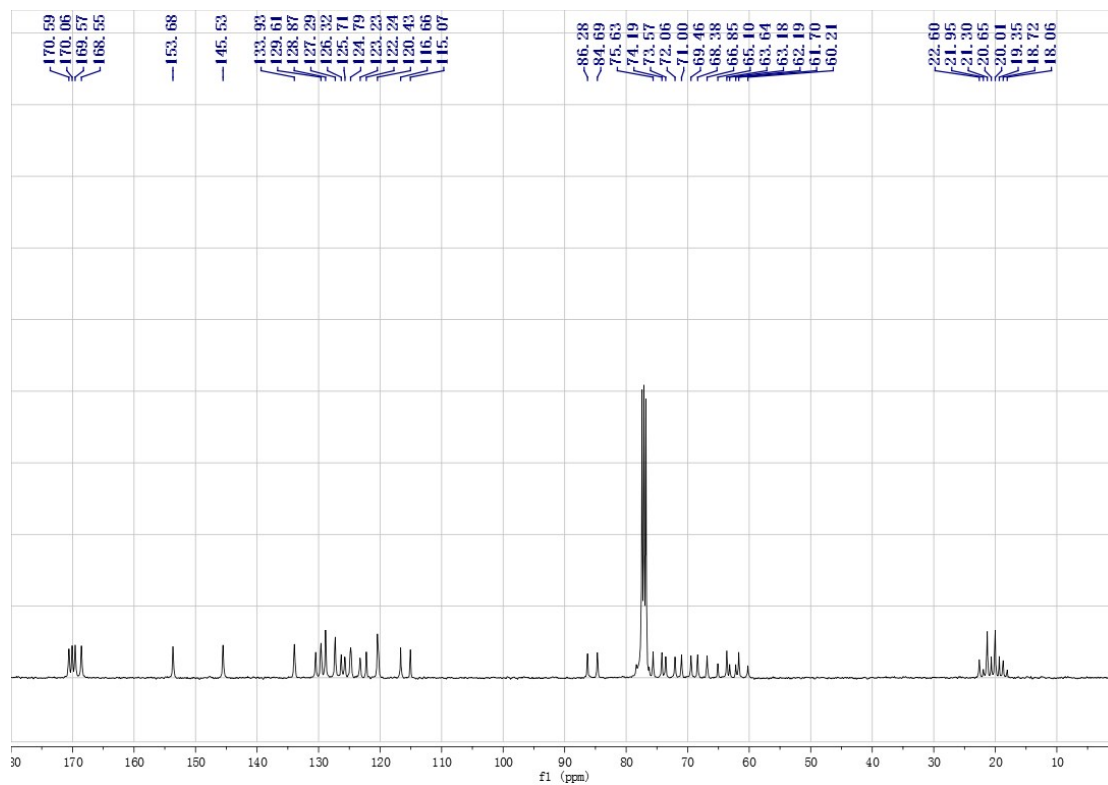

Figure S4  $^{13}\text{C}$ NMR of (*S*,  $\beta$ -*D*)-2( $\text{CDCl}_3$ )

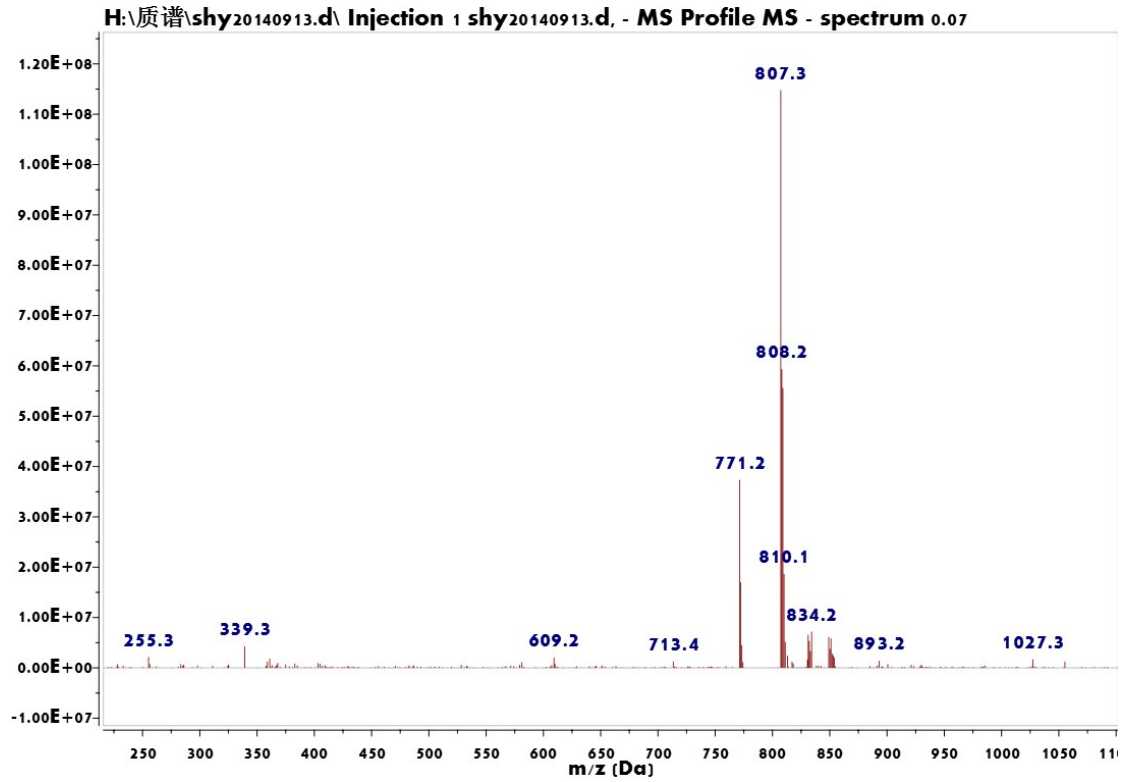

Figure S5 ESI-MS of (*S*,  $\beta$ -*D*)-1

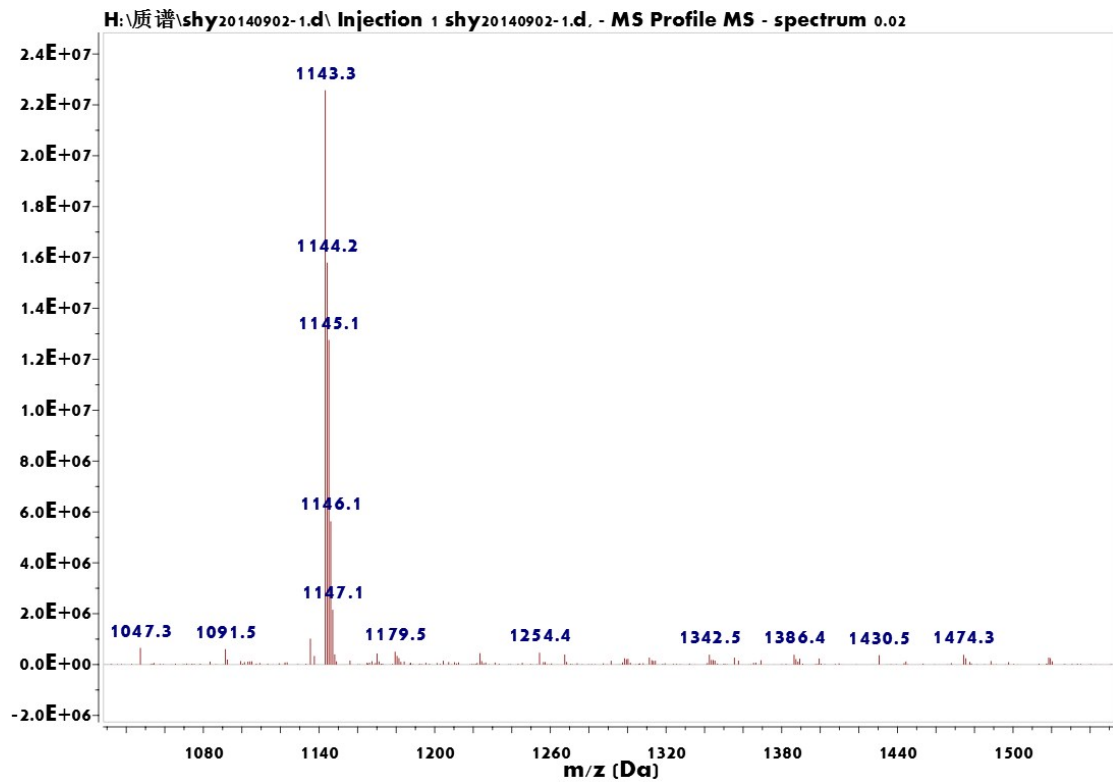

Figure S6 ESI-MS of (*S*,  $\beta$ -*D*)-2

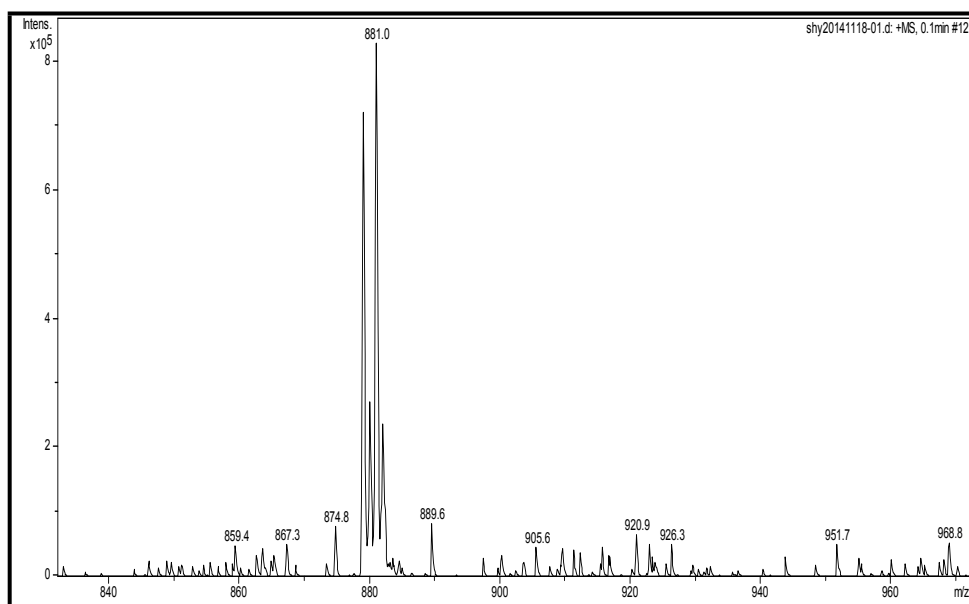

Figure S7. ESI-MS of [1-Ag<sup>+</sup>H<sup>+</sup>]

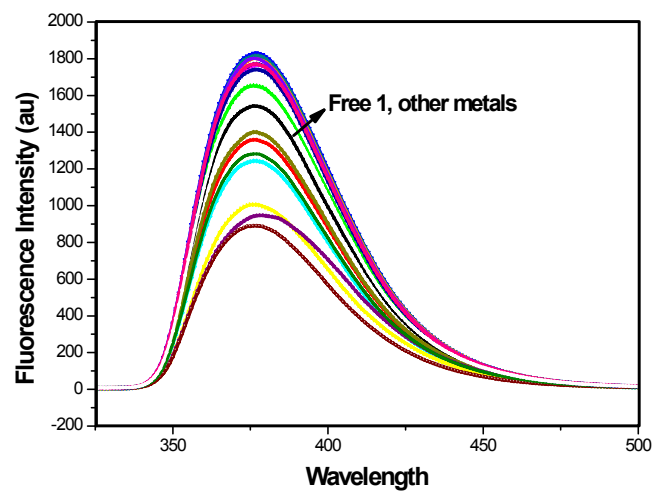

Figure S8 Fluorescence spectra of (S, β-D)-1 ( $2 \times 10^{-5}$  mol/L in THF) in presence of various ions such as K<sup>+</sup>, Ag<sup>+</sup>, Ba<sup>2+</sup>, Cd<sup>2+</sup>, Mg<sup>2+</sup>, Ca<sup>2+</sup>, Cr<sup>3+</sup>, Ni<sup>2+</sup>, Mn<sup>2+</sup>, Cu<sup>2+</sup>, Zn<sup>2+</sup>, Co<sup>2+</sup>, Hg<sup>2+</sup>, Al<sup>3+</sup>, Sn<sup>2+</sup>, Pb<sup>2+</sup>, and Sr<sup>2+</sup> ions (5 equiv).

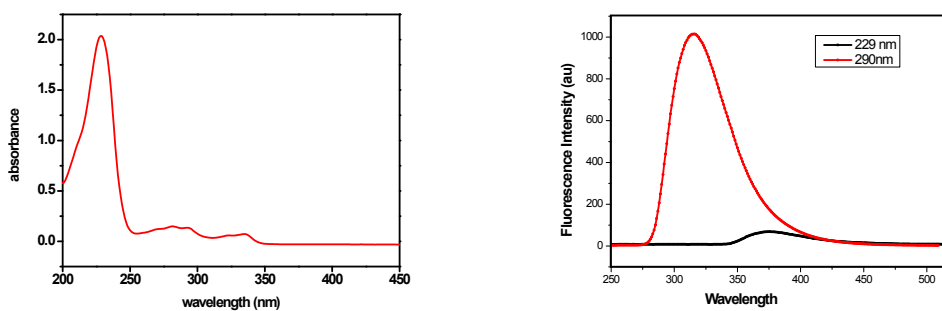

**Figure S9** (a) UV-vis spectra titration of (*S*,  $\beta$ -*D*)-1 ( $2 \times 10^{-5}$  mol/L in  $\text{CH}_3\text{OH}$ )  
 (b) Fluorescence spectra of (*S*,  $\beta$ -*D*)-1 ( $2 \times 10^{-5}$  mol/L in  $\text{CH}_3\text{OH}$ )

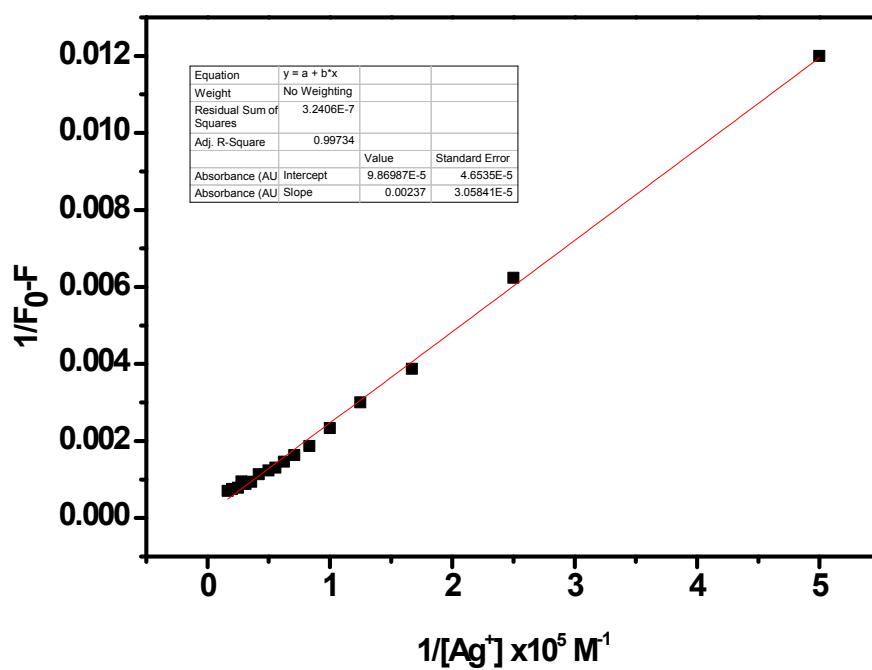

**Figure S10** Hildebrand-Benesi plot base on (*S*,  $\beta$ -*D*)-1 ( $2 \times 10^{-5}$  mol/L in  $\text{CH}_3\text{OH}$ ,  $\lambda_{\text{ex}}=290$  nm) in the presence of increasing amount 0-3 equiv  $\text{Ag}^+$  (0.01M), the binding constant is  $2.4 \times 10^6 \text{ M}^{-1}$ .

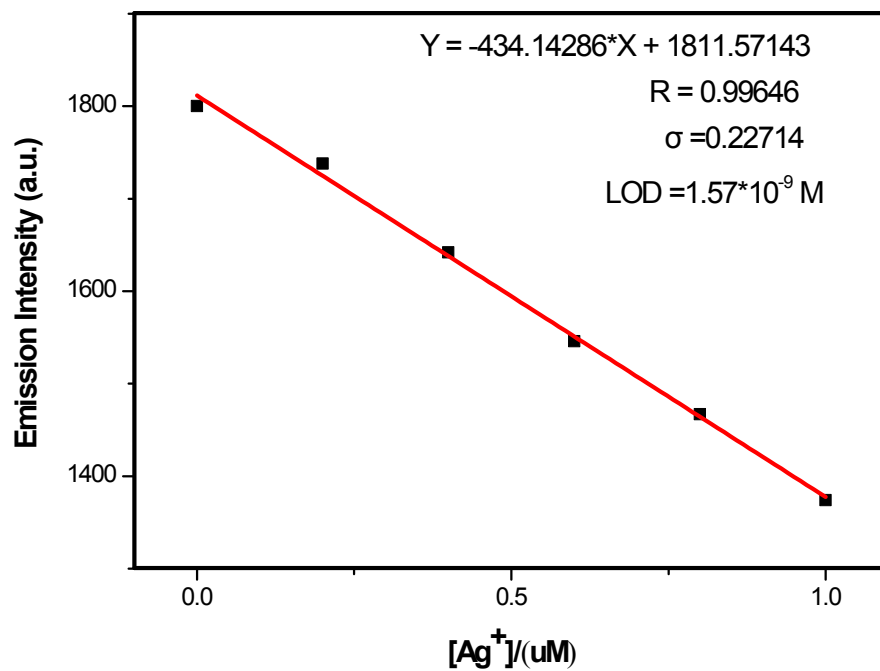

**Figure S11** The limit of detection (LOD), LOD is  $1.57 \times 10^{-9} \text{ M}$ .
